# Supplementary material for: BCL2 overexpression: clinical implication and biological insights in acute myeloid leukemia
Source: Diagn Pathol. 2019 Jun 29;14:68. doi: 10.1186/s13000-019-0841-1 (PMC6599255; doi:10.1186/s13000-019-0841-1)
Supplement: Supplementary file 2 — Different expressed genes of microRNA for BCL2high and BCL2low. (XLSX 50 kb) [file 13000_2019_841_MOESM2_ESM.xlsx]

## Sheet: All
Supplementary Materials 2
logFC	logCPM	PValue	FDR	gene
0.968766	17.0222	6.61322e-11	3.69679e-08	hsa-mir-21
0.741171	14.7444	6.23188e-09	1.74181e-06	hsa-mir-22
6.00073	5.33852	1.47978e-08	2.75732e-06	hsa-mir-1269
-1.59369	3.66902	6.524e-08	9.11729e-06	hsa-mir-195
-1.64315	3.8003	3.20678e-07	3.58518e-05	hsa-mir-497
1.23116	10.7281	4.03345e-07	3.75783e-05	hsa-mir-582
1.04009	6.261	5.91575e-07	4.72415e-05	hsa-mir-886
2.13904	3.15748	1.61784e-06	0.000113047	hsa-mir-935
-2.08594	3.90769	3.6172e-06	0.000198599	hsa-mir-135a-1
-2.26185	3.2147	3.82324e-06	0.000198599	hsa-mir-196a-2
0.789603	9.18838	3.90803e-06	0.000198599	hsa-mir-500
0.450827	11.7023	6.12591e-06	0.000267467	hsa-mir-24-2
-0.812333	5.34501	6.22016e-06	0.000267467	hsa-mir-551a
0.855271	6.53312	1.04847e-05	0.000418638	hsa-mir-152
0.83055	6.32556	1.27096e-05	0.000473644	hsa-mir-501
0.494449	11.0374	1.45206e-05	0.000507314	hsa-mir-1307
1.26225	7.8724	6.04953e-05	0.00198923	hsa-mir-1977
1.34957	2.62042	8.07388e-05	0.00250554	hsa-mir-885
0.623007	10.1317	8.51614e-05	0.00250554	hsa-mir-532
0.506008	5.6407	0.000134957	0.00364367	hsa-mir-132
-0.845983	8.77969	0.000136882	0.00364367	hsa-mir-125a
0.582204	3.46821	0.000169557	0.0043083	hsa-mir-940
0.406279	7.70726	0.000178346	0.00433458	hsa-mir-628
-0.988868	7.03221	0.000243332	0.00566761	hsa-mir-363
-0.965763	3.15484	0.000284502	0.00636147	hsa-mir-1266
0.347932	14.8742	0.000296615	0.00637723	hsa-mir-103-1
-0.763268	4.08843	0.000315178	0.00652535	hsa-mir-26a-1
-1.09433	5.00357	0.000508148	0.00994296	hsa-mir-193b
-1.05948	6.69308	0.000560382	0.00994296	hsa-mir-455
0.408145	15.0355	0.000579234	0.00994296	hsa-mir-223
0.61154	4.55423	0.000586247	0.00994296	hsa-mir-362
0.628441	3.18431	0.000586649	0.00994296	hsa-mir-877
-0.491332	4.66053	0.000586973	0.00994296	hsa-mir-320b-2
-0.726756	8.58936	0.000629466	0.0103492	hsa-mir-130a
-1.20544	5.79689	0.000687627	0.0109824	hsa-mir-375
0.361645	13.1014	0.000708797	0.011006	hsa-mir-23a
-1.93703	1.92478	0.000860826	0.0130055	hsa-mir-205
0.456189	3.52842	0.000914171	0.0134479	hsa-mir-2110
1.11889	3.05029	0.000955795	0.0136997	hsa-mir-511-2
0.521723	4.71058	0.0010255	0.0143313	hsa-mir-1249
0.519414	6.05579	0.00113043	0.0151067	hsa-mir-660
0.558542	4.38542	0.00113503	0.0151067	hsa-mir-502
0.313997	9.05304	0.00116262	0.015114	hsa-mir-484
0.358011	7.15743	0.0012175	0.0154677	hsa-mir-18a
0.221167	11.1257	0.00128283	0.0159356	hsa-mir-140
1.32683	2.27476	0.00197445	0.0239939	hsa-mir-944
0.519803	6.47623	0.00212708	0.0251074	hsa-mir-193a
0.745708	2.51115	0.00217706	0.0251074	hsa-mir-1180
0.868549	4.7571	0.00220653	0.0251074	hsa-mir-577
0.294519	8.10823	0.00224575	0.0251074	hsa-mir-185
-0.797659	1.9765	0.00278337	0.0301895	hsa-mir-320d-1
1.31347	2.17075	0.00280833	0.0301895	hsa-mir-129-1
1.03869	14.0919	0.00288808	0.030461	hsa-mir-1974
0.377475	10.7269	0.00356125	0.0368655	hsa-mir-378
1.01223	3.04239	0.00400895	0.0407455	hsa-mir-511-1
-0.543146	6.14525	0.004241	0.0423343	hsa-mir-181d
-0.516039	11.7221	0.00506231	0.0496462	hsa-mir-146a
0.260049	7.71152	0.00581661	0.0556862	hsa-mir-589
-0.677375	1.9413	0.00587744	0.0556862	hsa-mir-320c-1
-0.52452	14.9197	0.00637245	0.0589925	hsa-mir-181a-1
-1.45676	1.44659	0.00665178	0.0589925	hsa-mir-137
-0.311274	11.8675	0.00674532	0.0589925	hsa-mir-30b
-0.505418	11.9571	0.00675324	0.0589925	hsa-mir-181b-1
-1.07538	4.72088	0.00675406	0.0589925	hsa-mir-551b
-0.436306	3.06841	0.00696608	0.0599083	hsa-mir-659
-0.299403	10.055	0.00739276	0.0626145	hsa-mir-625
-0.582937	13.5976	0.00752878	0.0628147	hsa-mir-99b
1.17927	3.98673	0.00794025	0.0652735	hsa-mir-508
0.307919	4.77696	0.00856288	0.0693717	hsa-mir-330
-0.444754	12.7184	0.00890923	0.0711466	hsa-mir-146b
0.480852	2.74511	0.00937526	0.0731243	hsa-mir-1226
-0.467781	8.69522	0.00949086	0.0731243	hsa-mir-181c
-0.324384	7.27452	0.00954932	0.0731243	hsa-mir-16-2
1.32921	1.5442	0.0104906	0.0792464	hsa-mir-506
0.244112	7.58257	0.0111192	0.0828752	hsa-mir-324
0.307045	8.01717	0.0112925	0.083059	hsa-mir-328
-0.461517	6.0113	0.0114427	0.0830708	hsa-mir-181b-2
-0.478471	4.43797	0.0123068	0.0881115	hsa-mir-1271
-0.645173	7.99561	0.0124523	0.0881115	hsa-mir-99a
-0.53985	4.86921	0.0126387	0.0883126	hsa-mir-1291
-0.368161	8.25903	0.0134368	0.092579	hsa-mir-128-1
0.366156	7.31871	0.0135805	0.092579	hsa-mir-339
0.579389	3.25316	0.0143252	0.0959611	hsa-mir-188
-0.968898	9.00361	0.0144199	0.0959611	hsa-mir-134
0.451002	3.28971	0.014793	0.0970753	hsa-mir-1537
-0.253297	14.3925	0.0149347	0.0970753	hsa-mir-30d
-0.651665	3.50621	0.0158425	0.101792	hsa-mir-125b-2
0.277731	4.94691	0.018179	0.115478	hsa-mir-616
-0.709852	4.56083	0.0189497	0.119021	hsa-mir-196a-1
-0.641254	8.39124	0.0198462	0.123267	hsa-mir-20b
1.03115	1.4024	0.0207006	0.127161	hsa-mir-519a-1
0.580261	9.4055	0.0212112	0.128881	hsa-mir-151
-0.296247	9.58408	0.0216022	0.129846	hsa-let-7e
-1.29139	2.3145	0.0221846	0.131927	hsa-mir-1247
-0.487506	3.36912	0.0227159	0.132893	hsa-mir-1468
0.429727	3.28044	0.0228658	0.132893	hsa-mir-509-2
0.328329	4.7671	0.0230601	0.132893	hsa-mir-1976
-1.33907	1.67388	0.0237426	0.13543	hsa-mir-1197
-0.285801	4.5357	0.0241714	0.136483	hsa-mir-491
-0.43493	2.24948	0.025145	0.139758	hsa-mir-1179
-0.535987	2.29247	0.0252515	0.139758	hsa-mir-31
0.705886	1.57801	0.0271145	0.148598	hsa-mir-573
-0.337563	8.09973	0.0282469	0.153301	hsa-mir-1259
0.2301	11.9386	0.0295758	0.15897	hsa-mir-26b
-0.299618	4.71554	0.0332509	0.177021	hsa-mir-550-2
-0.22717	6.04073	0.0347617	0.183191	hsa-let-7f-1
0.36565	3.44683	0.0354816	0.183191	hsa-mir-301b
-0.23637	11.3317	0.0356999	0.183191	hsa-mir-221
1.01498	1.41135	0.0357206	0.183191	hsa-mir-518c
-1.03865	4.86207	0.0385848	0.193642	hsa-mir-370
0.803767	1.41892	0.0387737	0.193642	hsa-mir-1225
0.672679	2.86101	0.0387977	0.193642	hsa-mir-190b
-0.330445	7.44081	0.0400486	0.198117	hsa-mir-128-2
-0.195595	12.0726	0.0414383	0.203193	hsa-mir-26a-2
1.0031	1.96905	0.0423112	0.205669	hsa-mir-129-2
0.186538	11.5919	0.0427955	0.20623	hsa-mir-197
-0.246145	11.786	0.0432338	0.206451	hsa-mir-92a-1
0.697889	1.36646	0.0438089	0.206451	hsa-mir-526b
-0.649174	2.84804	0.0439492	0.206451	hsa-mir-96
0.728755	1.54111	0.0447172	0.208308	hsa-mir-138-2
-0.565681	1.94127	0.0460562	0.212772	hsa-mir-320d-2
0.365382	4.74381	0.0469784	0.215254	hsa-mir-326
-0.269656	6.65106	0.0488325	0.221687	hsa-mir-19b-1
0.504604	5.34229	0.0491757	0.221687	hsa-mir-139
-0.613068	5.80297	0.052141	0.233174	hsa-mir-133a-1
0.396813	2.3082	0.0536	0.236279	hsa-mir-548d-2
0.399361	2.00255	0.0536806	0.236279	hsa-mir-7-2
-0.249286	3.7921	0.0542521	0.236929	hsa-mir-24-1
0.29532	2.62662	0.0550137	0.237539	hsa-mir-1284
-0.322127	11.3963	0.0552417	0.237539	hsa-mir-181a-2
-0.63794	1.39792	0.0562889	0.240195	hsa-mir-610
-0.213096	10.0674	0.0575551	0.242037	hsa-mir-320a
-0.14951	11.6607	0.0575867	0.242037	hsa-let-7d
0.566035	1.75691	0.0598446	0.24965	hsa-mir-1538
0.503719	5.27852	0.0628126	0.25558	hsa-mir-708
0.244335	12.0434	0.0629359	0.25558	hsa-mir-27a
0.789181	1.53903	0.0630481	0.25558	hsa-mir-612
-0.256413	4.75122	0.0630948	0.25558	hsa-mir-1287
0.444148	14.2148	0.0641152	0.257844	hsa-mir-126
-0.232017	10.9232	0.0667176	0.264368	hsa-mir-199b
0.676276	1.36534	0.0675035	0.264368	hsa-mir-518a-1
0.279729	3.22631	0.0678369	0.264368	hsa-mir-421
-0.252467	7.07733	0.068007	0.264368	hsa-mir-766
-0.802575	1.45597	0.0681021	0.264368	hsa-mir-346
-0.268827	4.01099	0.0686051	0.264484	hsa-mir-651
-0.241453	5.35647	0.0727153	0.27841	hsa-mir-550-1
1.04932	1.44055	0.0742285	0.281186	hsa-mir-517b
1.04911	1.44055	0.0744463	0.281186	hsa-mir-517a
0.338014	3.13372	0.0761685	0.28576	hsa-mir-509-3
-0.202166	6.06797	0.0770055	0.286974	hsa-mir-576
0.813727	6.27841	0.0785967	0.29053	hsa-mir-452
-0.85071	4.88929	0.0789992	0.29053	hsa-mir-539
0.146365	6.90508	0.0795901	0.29079	hsa-mir-107
0.221123	6.30344	0.0802439	0.291275	hsa-mir-301a
-0.208286	10.6474	0.0825113	0.297573	hsa-mir-222
-0.603869	1.44881	0.0849434	0.300436	hsa-mir-1909
-0.311415	7.84474	0.0853518	0.300436	hsa-mir-1201
0.172628	7.67206	0.0853786	0.300436	hsa-mir-744
-0.217137	9.77114	0.085455	0.300436	hsa-mir-199a-2
-0.686931	2.61205	0.0861932	0.301137	hsa-mir-133b
0.542568	1.35881	0.0878147	0.303558	hsa-mir-1298
-0.199193	12.0384	0.0881416	0.303558	hsa-mir-15b
0.326192	2.18003	0.0889198	0.303558	hsa-mir-548j
0.144745	10.2926	0.0890581	0.303558	hsa-mir-15a
0.545275	1.35891	0.0911578	0.308831	hsa-mir-105-2
0.374456	13.2204	0.0962739	0.3242	hsa-mir-1826
0.290435	3.0509	0.0974853	0.326313	hsa-mir-1254
0.259614	2.72156	0.101304	0.335289	hsa-mir-1292
0.508794	1.99183	0.101367	0.335289	hsa-mir-1910
0.527369	1.358	0.104036	0.342093	hsa-mir-527
0.902458	2.06652	0.104779	0.342524	hsa-mir-9-3
-0.854744	1.57431	0.105987	0.344458	hsa-mir-615
-0.390989	8.88037	0.106753	0.344942	hsa-mir-335
-0.62994	2.15661	0.107997	0.345136	hsa-mir-483
-0.203128	8.84249	0.108048	0.345136	hsa-mir-199a-1
0.386094	2.34726	0.110055	0.349549	hsa-mir-212
0.627084	1.67319	0.11216	0.35315	hsa-mir-1228
0.155946	7.0044	0.112452	0.35315	hsa-mir-98
0.197582	7.42212	0.11403	0.356105	hsa-mir-590
0.446211	1.82176	0.114944	0.356502	hsa-mir-937
-0.889711	3.23676	0.115895	0.356502	hsa-mir-299
0.159207	7.01359	0.11607	0.356502	hsa-mir-652
0.40541	7.68989	0.116735	0.356584	hsa-mir-1978
0.603066	1.45716	0.117752	0.357737	hsa-mir-876
0.589202	1.5485	0.120403	0.363813	hsa-mir-147b
-0.195497	8.96974	0.122836	0.369169	hsa-mir-106a
-0.677402	4.2437	0.125325	0.37368	hsa-mir-485
0.180015	5.07615	0.125674	0.37368	hsa-mir-1306
-0.586255	1.80013	0.127197	0.374984	hsa-mir-133a-2
0.411478	1.68965	0.127454	0.374984	hsa-mir-1229
0.464321	1.35625	0.128886	0.375712	hsa-mir-1264
-0.460947	1.35781	0.129151	0.375712	hsa-mir-1322
0.866699	1.95434	0.129718	0.375712	hsa-mir-514-2
-0.143186	14.6949	0.131727	0.377867	hsa-mir-25
-0.552707	1.67774	0.132279	0.377867	hsa-mir-202
-0.371734	9.89689	0.13249	0.377867	hsa-let-7c
-0.690218	6.78297	0.133686	0.378979	hsa-mir-654
0.557497	10.2552	0.134236	0.378979	hsa-mir-9-1
0.548535	10.2588	0.141239	0.394884	hsa-mir-9-2
-0.385245	3.93155	0.141282	0.394884	hsa-mir-365-1
-0.344355	1.84484	0.144075	0.399757	hsa-mir-320c-2
-0.509642	7.08794	0.144849	0.399757	hsa-mir-203
0.599078	1.87074	0.145171	0.399757	hsa-mir-653
-0.740476	5.01197	0.146301	0.400894	hsa-mir-154
0.477282	1.35643	0.14796	0.403461	hsa-mir-922
-0.497599	1.3702	0.149393	0.405392	hsa-mir-372
0.204882	6.52087	0.151561	0.409289	hsa-mir-200c
-0.171118	10.7641	0.155876	0.418917	hsa-mir-29c
-0.106438	9.54965	0.158985	0.425229	hsa-mir-361
-0.210121	6.35551	0.16188	0.430908	hsa-mir-874
-0.13845	12.2228	0.172698	0.45713	hsa-mir-30c-2
-0.677683	4.53026	0.173366	0.45713	hsa-mir-323
-0.154457	7.23637	0.175279	0.460005	hsa-mir-32
0.696637	2.06764	0.18025	0.47084	hsa-mir-514-3
-0.156801	13.4938	0.182787	0.475247	hsa-mir-101-1
-0.102416	11.7043	0.187553	0.485381	hsa-let-7g
0.487959	1.37077	0.191804	0.494095	hsa-mir-513a-1
0.498778	1.35742	0.193024	0.494957	hsa-mir-522
-0.352304	9.14875	0.203865	0.520367	hsa-mir-424
0.361367	1.48266	0.205337	0.521743	hsa-mir-1237
-0.10264	13.3322	0.206579	0.522524	hsa-mir-16-1
0.276529	2.44713	0.210623	0.530354	hsa-mir-1308
0.424817	1.68549	0.213511	0.533046	hsa-mir-548k
-0.253	10.9339	0.213606	0.533046	hsa-mir-143
-0.6338	2.78137	0.2154	0.533046	hsa-mir-376a-1
0.218467	14.6814	0.216249	0.533046	hsa-let-7b
0.485081	1.39021	0.217351	0.533046	hsa-mir-572
-0.139546	15.8522	0.217414	0.533046	hsa-mir-92a-2
-0.465817	1.37829	0.218468	0.53329	hsa-mir-453
0.218693	2.3239	0.223191	0.542452	hsa-mir-548e
0.272792	2.25063	0.225555	0.545825	hsa-mir-760
-0.275827	10.8831	0.228038	0.547574	hsa-mir-182
-0.37062	6.24286	0.228237	0.547574	hsa-mir-153-2
-0.138567	11.6117	0.240238	0.573903	hsa-mir-20a
-0.339279	1.35075	0.248422	0.590927	hsa-mir-1260
0.360881	1.35189	0.256878	0.608193	hsa-mir-647
0.207968	14.8042	0.257856	0.608193	hsa-mir-148a
0.371751	1.35308	0.259511	0.609523	hsa-mir-1231
0.145998	10.0118	0.261088	0.610663	hsa-mir-374a
-0.579398	3.89341	0.263702	0.614206	hsa-mir-494
-0.318937	1.39538	0.266078	0.617168	hsa-mir-206
0.302955	2.17217	0.26727	0.617372	hsa-mir-581
-0.288535	3.91493	0.268894	0.618224	hsa-mir-365-2
0.527535	7.26045	0.270416	0.618224	hsa-mir-224
-0.665552	1.63905	0.270957	0.618224	hsa-mir-665
-0.10663	8.66107	0.273588	0.620515	hsa-mir-27b
-0.536638	5.65732	0.274181	0.620515	hsa-mir-337
0.484784	1.50024	0.27636	0.620557	hsa-mir-138-1
-0.539639	6.45605	0.276683	0.620557	hsa-mir-136
0.467646	13.0054	0.27753	0.620557	hsa-mir-100
0.21671	8.92578	0.279625	0.621164	hsa-mir-338
0.180278	12.3538	0.280024	0.621164	hsa-mir-425
-0.287369	3.40845	0.281617	0.62223	hsa-mir-1270
0.510819	1.42105	0.283291	0.623463	hsa-mir-513b
0.18995	7.22234	0.291014	0.637948	hsa-mir-574
-0.60533	2.04137	0.297427	0.648026	hsa-mir-380
-0.484355	5.1919	0.29793	0.648026	hsa-mir-382
0.399237	1.36569	0.302417	0.652921	hsa-mir-519a-2
-0.532016	4.41416	0.302516	0.652921	hsa-mir-758
0.342103	2.00173	0.305612	0.657066	hsa-mir-663
-0.0840054	15.4434	0.307998	0.659658	hsa-mir-30e
-0.107045	6.47977	0.312566	0.666888	hsa-mir-331
-0.215699	3.06725	0.314661	0.667407	hsa-mir-200a
0.435864	1.47026	0.315198	0.667407	hsa-mir-1234
-0.428244	2.92423	0.321522	0.678229	hsa-mir-1304
-0.514079	3.81553	0.325194	0.681028	hsa-mir-411
0.0997133	8.44469	0.325899	0.681028	hsa-mir-148b
-0.563968	2.57076	0.327507	0.681028	hsa-mir-376a-2
-0.122956	8.45944	0.327722	0.681028	hsa-mir-629
-0.32685	1.37414	0.331882	0.686374	hsa-mir-875
0.0975028	13.8451	0.333274	0.686374	hsa-mir-191
-0.527614	2.49896	0.333978	0.686374	hsa-mir-487a
-0.0948034	7.986	0.336476	0.688495	hsa-mir-374b
-0.348666	5.19797	0.338213	0.688495	hsa-mir-1-2
-0.463997	5.42235	0.33988	0.688495	hsa-mir-369
-0.124284	2.3434	0.340828	0.688495	hsa-mir-548d-1
0.333815	16.8289	0.341168	0.688495	hsa-mir-10a
-0.211176	9.55549	0.347508	0.698766	hsa-mir-144
-0.472715	5.74656	0.350485	0.702227	hsa-mir-493
0.0982992	9.13494	0.357605	0.713933	hsa-mir-29b-2
-0.49008	2.62887	0.358887	0.713943	hsa-mir-543
-0.116703	6.89085	0.362099	0.715022	hsa-mir-194-1
0.211972	9.92811	0.362584	0.715022	hsa-mir-30a
-0.0951859	16.572	0.363267	0.715022	hsa-mir-142
-0.178546	2.95667	0.36456	0.71505	hsa-mir-643
-0.394899	1.38545	0.370933	0.723411	hsa-mir-1299
-0.317526	1.36088	0.371411	0.723411	hsa-mir-1293
0.217695	4.09532	0.377061	0.731865	hsa-mir-642
-0.32869	1.44921	0.380765	0.735251	hsa-mir-1-1
-0.0947994	5.70178	0.381436	0.735251	hsa-mir-942
-0.393651	5.97066	0.384935	0.739445	hsa-mir-409
0.161112	1.60525	0.388776	0.744267	hsa-mir-658
0.0845077	12.1503	0.391749	0.745143	hsa-mir-28
-0.0992495	4.01474	0.3919	0.745143	hsa-mir-624
0.170919	2.43682	0.40533	0.767803	hsa-mir-570
-0.0901599	3.82264	0.406565	0.767803	hsa-mir-627
0.43162	1.39387	0.412874	0.777093	hsa-mir-1244
-0.187386	2.17522	0.415466	0.779347	hsa-mir-641
0.348602	1.46853	0.419521	0.784322	hsa-mir-1908
-0.0958454	6.94065	0.42172	0.785804	hsa-mir-664
0.377454	2.39717	0.429912	0.798183	hsa-mir-412
0.080216	7.85522	0.432282	0.798183	hsa-mir-130b
-0.396377	1.41923	0.432647	0.798183	hsa-mir-488
0.3712	1.35884	0.435267	0.800376	hsa-mir-510
0.160985	2.6984	0.439085	0.80465	hsa-mir-1255a
0.165741	3.36487	0.44047	0.80465	hsa-mir-296
0.144122	6.24072	0.443789	0.806683	hsa-mir-33a
-0.374657	1.37056	0.444469	0.806683	hsa-mir-617
-0.368296	1.38792	0.447937	0.808085	hsa-mir-561
0.197393	2.10689	0.448133	0.808085	hsa-mir-939
-0.0755649	3.53722	0.451916	0.811479	hsa-mir-30c-1
-0.356282	5.3305	0.452918	0.811479	hsa-mir-495
-0.0696053	12.7272	0.455379	0.813281	hsa-let-7f-2
0.0867481	5.06137	0.457752	0.814916	hsa-mir-1301
0.0856226	7.23552	0.462388	0.82039	hsa-mir-340
-0.113814	5.73839	0.463762	0.82039	hsa-mir-101-2
-0.105206	2.29145	0.468291	0.825788	hsa-mir-580
-0.223192	2.72821	0.470927	0.827825	hsa-mir-218-2
-0.0895584	10.4273	0.473262	0.829322	hsa-mir-192
-0.248524	3.69238	0.474945	0.82967	hsa-mir-675
0.0648845	8.41465	0.48274	0.831552	hsa-mir-505
0.0684716	14.0809	0.484528	0.831552	hsa-let-7a-2
0.068175	13.0978	0.485343	0.831552	hsa-let-7a-3
0.0838547	8.88776	0.486136	0.831552	hsa-mir-29b-1
-0.359344	2.92905	0.486783	0.831552	hsa-mir-496
0.255751	1.49803	0.489275	0.831552	hsa-mir-933
-0.122305	3.95741	0.489757	0.831552	hsa-mir-1296
0.287967	1.40711	0.489765	0.831552	hsa-mir-720
-0.102638	3.15932	0.490744	0.831552	hsa-mir-219-1
0.195575	5.28876	0.49212	0.831552	hsa-mir-1274b
0.0668155	13.0912	0.492386	0.831552	hsa-let-7a-1
-0.240217	1.34707	0.494368	0.832384	hsa-mir-371
-0.247336	1.34823	0.500372	0.837165	hsa-mir-1285-2
-0.254253	1.3485	0.500587	0.837165	hsa-mir-544
0.358345	1.45035	0.5017	0.837165	hsa-mir-1185-2
-0.342332	1.91775	0.504536	0.839082	hsa-mir-329-2
0.249724	1.34638	0.505851	0.839082	hsa-mir-1912
-0.113752	12.5318	0.508565	0.841089	hsa-mir-155
0.260983	1.34852	0.510471	0.84175	hsa-mir-489
0.322511	1.3489	0.516713	0.84898	hsa-mir-516a-1
0.288778	1.34999	0.517893	0.84898	hsa-mir-520f
-0.0835434	11.6036	0.521554	0.852482	hsa-mir-19b-2
0.135821	2.91515	0.525878	0.853105	hsa-mir-33b
0.215594	3.59273	0.526179	0.853105	hsa-mir-450a-2
-0.338011	3.35067	0.528506	0.853105	hsa-mir-432
-0.224911	1.34645	0.529802	0.853105	hsa-mir-891b
-0.333482	1.9399	0.529957	0.853105	hsa-mir-329-1
0.228027	1.34633	0.532528	0.853105	hsa-mir-518f
0.227986	1.34633	0.532618	0.853105	hsa-mir-516b-2
0.184844	7.9272	0.536369	0.855933	hsa-mir-542
0.202588	1.34607	0.538143	0.855933	hsa-mir-591
-0.168539	2.25422	0.542895	0.855933	hsa-mir-122
-0.33996	1.35052	0.547496	0.855933	hsa-mir-1178
-0.10736	3.25325	0.54863	0.855933	hsa-mir-200b
-0.244621	1.51316	0.549425	0.855933	hsa-mir-600
-0.282292	1.487	0.549906	0.855933	hsa-mir-204
-0.245578	1.38029	0.550041	0.855933	hsa-mir-599
0.260927	3.85575	0.550505	0.855933	hsa-mir-217
-0.28769	4.98863	0.551183	0.855933	hsa-mir-431
-0.302597	1.43293	0.551227	0.855933	hsa-mir-555
-0.271952	1.38539	0.559904	0.866999	hsa-mir-552
-0.26073	1.49288	0.566943	0.874477	hsa-mir-1295
0.230692	2.74264	0.567863	0.874477	hsa-mir-187
-0.255941	2.07663	0.569962	0.875299	hsa-mir-504
0.264231	1.49211	0.575354	0.881159	hsa-mir-1181
-0.103641	9.07715	0.580017	0.885873	hsa-mir-584
-0.0631533	12.8944	0.585127	0.891242	hsa-mir-29a
-0.0710982	12.8236	0.587125	0.891855	hsa-mir-1975
0.290181	1.50281	0.592589	0.897716	hsa-mir-765
-0.15834	2.34038	0.598061	0.901488	hsa-mir-663b
-0.124009	11.6384	0.598304	0.901488	hsa-mir-451
-0.312833	3.37535	0.602431	0.905266	hsa-mir-655
-0.318819	2.16941	0.611968	0.916939	hsa-mir-656
-0.220176	1.54756	0.61348	0.916939	hsa-mir-1224
-0.315232	1.35688	0.616436	0.918901	hsa-mir-559
-0.210159	1.35635	0.621506	0.923477	hsa-mir-1245
-0.272455	1.35595	0.62281	0.923477	hsa-mir-585
-0.250288	1.35838	0.625379	0.924833	hsa-mir-518a-2
0.234083	1.3544	0.634002	0.93511	hsa-mir-1911
0.242602	1.35596	0.635724	0.935183	hsa-mir-211
-0.167162	1.81772	0.637834	0.935825	hsa-mir-429
-0.0956016	7.7199	0.64326	0.93955	hsa-mir-34a
0.280522	1.62759	0.644465	0.93955	hsa-mir-124-1
0.202458	1.90976	0.645415	0.93955	hsa-mir-556
0.263876	2.02262	0.648797	0.942019	hsa-mir-514-1
-0.163251	2.35258	0.653878	0.946079	hsa-mir-214
0.212824	1.35548	0.654978	0.946079	hsa-mir-1246
0.0890198	4.35737	0.657329	0.947028	hsa-mir-141
-0.0385002	10.8197	0.661263	0.950247	hsa-mir-186
0.242572	1.35835	0.663686	0.951283	hsa-mir-518e
-0.149416	1.55369	0.668077	0.955128	hsa-mir-1285-1
-0.250467	1.4271	0.67049	0.956133	hsa-mir-1286
-0.14359	1.69257	0.676799	0.96	hsa-mir-873
-0.234022	1.50585	0.67877	0.96	hsa-mir-605
-0.242276	1.55306	0.67957	0.96	hsa-mir-770
-0.245795	2.71641	0.680072	0.96	hsa-mir-376b
0.208721	1.52279	0.683614	0.961204	hsa-mir-548l
0.218488	1.65338	0.684363	0.961204	hsa-mir-216b
-0.0382068	5.62459	0.688734	0.964919	hsa-mir-769
-0.0334221	11.1354	0.694418	0.969107	hsa-mir-106b
-0.0555426	9.33431	0.695191	0.969107	hsa-mir-342
-0.166241	9.45427	0.699053	0.97175	hsa-mir-379
0.0560673	8.8566	0.700564	0.97175	hsa-mir-19a
-0.131094	4.9406	0.705859	0.974385	hsa-mir-1275
0.113715	3.13037	0.708141	0.974385	hsa-mir-149
0.209273	1.36277	0.710497	0.974385	hsa-mir-1303
0.0277408	10.5667	0.711675	0.974385	hsa-let-7i
-0.112573	9.34931	0.712112	0.974385	hsa-mir-125b-1
0.110226	1.53406	0.714066	0.974385	hsa-mir-1256
-0.0673541	8.87913	0.714665	0.974385	hsa-mir-145
-0.0978608	12.9192	0.720616	0.978162	hsa-mir-196b
-0.175701	4.72042	0.720935	0.978162	hsa-mir-487b
0.197575	4.17338	0.728134	0.985538	hsa-mir-410
0.115711	3.68106	0.738086	0.994908	hsa-mir-450a-1
-0.14341	9.35617	0.738617	0.994908	hsa-mir-127
-0.0400645	7.13184	0.74678	0.998989	hsa-mir-194-2
0.0377855	6.09431	0.747074	0.998989	hsa-mir-103-2
-0.165356	1.38015	0.748427	0.998989	hsa-mir-611
-0.055377	2.65866	0.748795	0.998989	hsa-mir-190
0.0503375	6.15213	0.753553	0.999695	hsa-mir-92b
0.0368887	8.62761	0.754914	0.999695	hsa-mir-345
-0.198426	2.21582	0.75524	0.999695	hsa-mir-433
-0.0961969	3.00716	0.756477	0.999695	hsa-mir-618
-0.178223	3.5617	0.763004	1	hsa-mir-377
0.0902133	1.76041	0.764827	1	hsa-mir-607
0.284805	1.38397	0.769143	1	hsa-mir-1236
-0.165908	1.52418	0.775318	1	hsa-mir-1185-1
-0.129406	1.55811	0.77541	1	hsa-mir-1227
-0.237463	1.3711	0.778526	1	hsa-mir-520d
0.0658154	9.02869	0.781689	1	hsa-mir-486
-0.0762971	1.61584	0.790311	1	hsa-mir-1278
0.117757	2.21954	0.797231	1	hsa-mir-1277
-0.0953092	1.62595	0.799771	1	hsa-mir-597
0.0643584	1.68561	0.812506	1	hsa-mir-7-3
0.143651	1.6569	0.826638	1	hsa-mir-548b
0.0345788	1.70863	0.828599	1	hsa-mir-499
-0.0166675	9.87512	0.831689	1	hsa-mir-423
-0.0596009	11.1599	0.834661	1	hsa-mir-10b
-0.123087	1.88976	0.837456	1	hsa-mir-1288
-0.107717	1.43003	0.83934	1	hsa-mir-891a
0.0545042	1.78312	0.846097	1	hsa-mir-636
-0.057914	1.77246	0.858803	1	hsa-mir-135b
-0.0911831	5.3513	0.864332	1	hsa-mir-376c
0.138911	1.51602	0.864918	1	hsa-mir-513c
0.0301986	8.5835	0.878005	1	hsa-mir-210
-0.0766466	1.4867	0.879917	1	hsa-mir-124-2
0.0426663	3.23791	0.880606	1	hsa-mir-509-1
-0.0139705	14.0208	0.882782	1	hsa-mir-93
0.0354814	2.11906	0.884903	1	hsa-mir-545
0.285896	1.46533	0.887058	1	hsa-mir-1979
-0.127669	1.4885	0.887951	1	hsa-mir-124-3
-0.0596998	1.51481	0.888997	1	hsa-mir-1262
0.0154663	8.04683	0.891837	1	hsa-mir-7-1
-0.0538616	1.846	0.903122	1	hsa-mir-95
-0.0971873	1.5543	0.905266	1	hsa-mir-490
-0.0270442	9.58686	0.915195	1	hsa-mir-183
0.0106955	13.0021	0.915809	1	hsa-mir-17
-0.0476741	2.03854	0.916302	1	hsa-mir-34b
0.051295	4.67419	0.919919	1	hsa-mir-889
0.0718649	1.60794	0.921382	1	hsa-mir-541
0.0484198	2.72004	0.921972	1	hsa-mir-34c
0.0141046	12.03	0.937109	1	hsa-mir-150
-0.0217085	2.81057	0.937622	1	hsa-mir-153-1
0.0199126	4.08535	0.939935	1	hsa-mir-1248
-0.0105943	2.83606	0.941884	1	hsa-mir-579
0.0412045	1.601	0.943526	1	hsa-mir-548a-3
0.0339371	5.81818	0.94725	1	hsa-mir-381
0.0221405	5.58204	0.948108	1	hsa-mir-503
-0.0139089	5.06617	0.95718	1	hsa-mir-598
-0.0040966	5.83613	0.969095	1	hsa-mir-454
-0.00390171	8.59527	0.973458	1	hsa-mir-23b
0.00148718	5.29164	0.973574	1	hsa-mir-671
-0.0272318	3.25248	0.975568	1	hsa-mir-215
-0.00892703	4.69162	0.978516	1	hsa-mir-450b
-0.054641	1.44398	0.981535	1	hsa-mir-592
-0.0767274	1.55038	0.98195	1	hsa-mir-668
-0.100984	1.41536	0.982198	1	hsa-mir-548n
-0.0155319	1.41189	0.982875	1	hsa-mir-1915
-0.0722205	1.39733	0.983747	1	hsa-mir-1914
-0.148882	1.38875	0.984487	1	hsa-mir-586
-0.139178	1.38965	0.985269	1	hsa-mir-219-2
-0.134504	1.40213	0.985735	1	hsa-mir-1258
-0.194201	1.36283	0.989181	1	hsa-mir-1302-3
-0.106852	1.35992	0.989212	1	hsa-mir-938
-0.105175	1.36112	0.98926	1	hsa-mir-1913
-0.0844734	1.3615	0.989303	1	hsa-mir-1539
-0.0923682	1.36002	0.98977	1	hsa-mir-767
-0.0836564	1.36137	0.990181	1	hsa-mir-105-1
-0.215034	1.35295	0.991332	1	hsa-mir-1238
-0.10722	1.35226	0.991377	1	hsa-mir-934
-0.132939	1.35235	0.991399	1	hsa-mir-1280
-0.121771	1.35266	0.991427	1	hsa-mir-623
-0.0516403	1.35141	0.99173	1	hsa-mir-507
-0.0815558	1.35263	0.991809	1	hsa-mir-383
-0.125049	1.34281	0.99422	1	hsa-mir-208a
-0.125018	1.34256	0.99422	1	hsa-mir-626
-0.125003	1.34246	0.99422	1	hsa-mir-602
-0.124936	1.34204	0.99422	1	hsa-mir-1323
-0.124916	1.34194	0.99422	1	hsa-mir-644
-0.124901	1.34186	0.99422	1	hsa-mir-1252
-0.125346	1.34309	0.99422	1	hsa-mir-645
-0.127734	1.34335	0.99422	1	hsa-mir-1182
-0.160581	1.34468	0.99422	1	hsa-mir-523
-0.132638	1.34361	0.99422	1	hsa-mir-640
-0.173289	1.34508	0.99422	1	hsa-mir-320b-1
-0.128538	1.3434	0.99422	1	hsa-mir-609
0.249308	1.34419	1	1	hsa-mir-525
0.18595	1.34405	1	1	hsa-mir-524
0.185876	1.34405	1	1	hsa-mir-519b
0.161523	1.34478	1	1	hsa-mir-1282
0.15748	1.37966	1	1	hsa-mir-518b
0.144725	1.34409	1	1	hsa-mir-1289-1
0.143732	1.34404	1	1	hsa-mir-1204
0.140558	1.34388	1	1	hsa-mir-657
0.140512	1.34388	1	1	hsa-mir-1184
0.138453	1.34378	1	1	hsa-mir-1300
0.134792	1.34356	1	1	hsa-mir-1290
0.130539	1.34312	1	1	hsa-mir-1825
0.130272	1.34269	1	1	hsa-mir-515-1
0.130261	1.34261	1	1	hsa-mir-512-1
0.130261	1.34261	1	1	hsa-mir-517c
0.130261	1.34261	1	1	hsa-mir-521-2
0.130072	1.34161	1	1	hsa-mir-1243
0.130034	1.34147	1	1	hsa-mir-1283-2
0.130034	1.34147	1	1	hsa-mir-512-2
0.130034	1.34147	1	1	hsa-mir-516a-2
0.124575	1.34941	1	1	hsa-mir-650
0.115987	1.37847	1	1	hsa-mir-519d
0.10681	1.36531	1	1	hsa-mir-449a
0.0974424	1.4766	1	1	hsa-mir-216a
0.0878415	1.35722	1	1	hsa-mir-520a
0.0808008	1.3948	1	1	hsa-mir-513a-2
-0.0718492	1.36503	1	1	hsa-mir-218-1
-0.0630652	1.39843	1	1	hsa-mir-184
0.0520124	1.4064	1	1	hsa-mir-606
0.0461565	1.4459	1	1	hsa-mir-943
0.0456939	1.81265	1	1	hsa-mir-1294
-0.0434895	1.39055	1	1	hsa-mir-520g
0.0395564	1.38107	1	1	hsa-mir-1276
0.0273223	1.38026	1	1	hsa-mir-564
0.0255105	1.34842	1	1	hsa-mir-373
0.0252697	1.58313	1	1	hsa-mir-887
0.0152249	1.96762	1	1	hsa-mir-548o
0.013983	1.38692	1	1	hsa-mir-588
0.0129113	1.62866	1	1	hsa-mir-639
0.0108536	1.35725	1	1	hsa-mir-548f-1
-0.0104182	1.34726	1	1	hsa-mir-520b
0.00949134	2.4689	1	1	hsa-mir-18b
0.00836696	1.59314	1	1	hsa-mir-1250
0.00674226	1.70403	1	1	hsa-mir-632
0.00609668	1.34797	1	1	hsa-mir-1257
0.00601563	1.34693	1	1	hsa-mir-638
0.00558403	1.34535	1	1	hsa-mir-548p
0.00542077	1.34748	1	1	hsa-mir-802
0.00525091	1.3464	1	1	hsa-mir-549
0.00488343	1.345	1	1	hsa-mir-449b
-0.00433604	1.36835	1	1	hsa-mir-520h
0.00427868	1.35778	1	1	hsa-mir-621
-0.00306113	1.34793	1	1	hsa-mir-1973

## Sheet: Negatively correlated
logFC	logCPM	PValue	FDR	gene
-1.59369	3.66902	6.524e-08	9.11729e-06	hsa-mir-195
-1.64315	3.8003	3.20678e-07	3.58518e-05	hsa-mir-497
-2.08594	3.90769	3.6172e-06	0.000198599	hsa-mir-135a-1
-2.26185	3.2147	3.82324e-06	0.000198599	hsa-mir-196a-2
-1.09433	5.00357	0.000508148	0.00994296	hsa-mir-193b
-1.05948	6.69308	0.000560382	0.00994296	hsa-mir-455
-1.20544	5.79689	0.000687627	0.0109824	hsa-mir-375
-1.93703	1.92478	0.000860826	0.0130055	hsa-mir-205

## Sheet: Positively correlated
logFC	logCPM	PValue	FDR	gene
6.00073	5.33852	1.47978e-08	2.75732e-06	hsa-mir-1269
1.23116	10.7281	4.03345e-07	3.75783e-05	hsa-mir-582
1.04009	6.261	5.91575e-07	4.72415e-05	hsa-mir-886
2.13904	3.15748	1.61784e-06	0.000113047	hsa-mir-935
1.26225	7.8724	6.04953e-05	0.00198923	hsa-mir-1977
1.34957	2.62042	8.07388e-05	0.00250554	hsa-mir-885
1.11889	3.05029	0.000955795	0.0136997	hsa-mir-511-2
1.32683	2.27476	0.00197445	0.0239939	hsa-mir-944
1.31347	2.17075	0.00280833	0.0301895	hsa-mir-129-1
1.03869	14.0919	0.00288808	0.030461	hsa-mir-1974
1.01223	3.04239	0.00400895	0.0407455	hsa-mir-511-1
